# Supplementary material for: Polydopamine nanoparticles doped in liquid crystal elastomers for producing dynamic 3D structures
Source: Royal Society of Chemistry journal article supplement (doi:10.1039/c7ta00458c), 2017-01-01
Supplement: c7ta00458c1.pdf [file c7ta00458c1.pdf]

## Polydopamine Nanoparticles Doped Liquid Crystal Elastomers for 3D Dynamic Structures

Zhen Li, Yang Yang, Zhenhua Wang, Xiaoyong Zhang, Qiaomei Chen, Xiaojie Qian, Na  
Liu, Yen Wei\* and Yan Ji\*

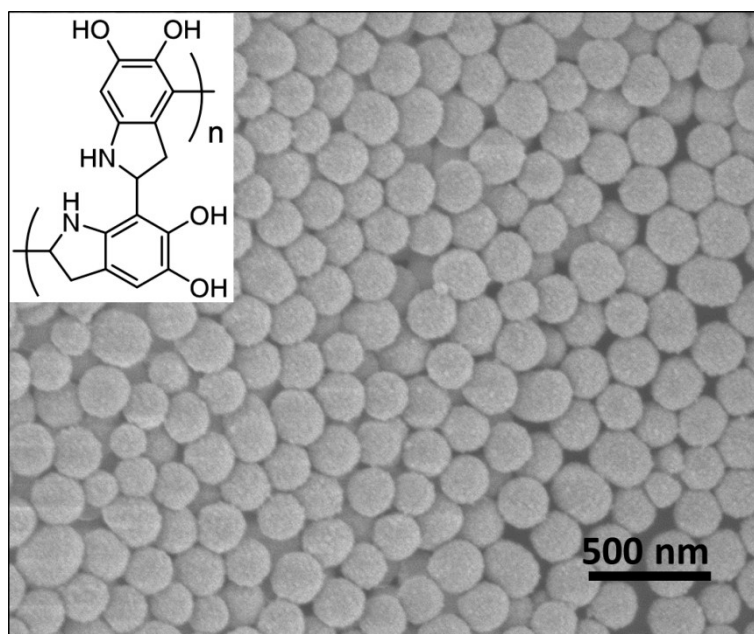

**Figure S1.** SEM image of PDA nanoparticles. Inset: chemical structure of PDA.

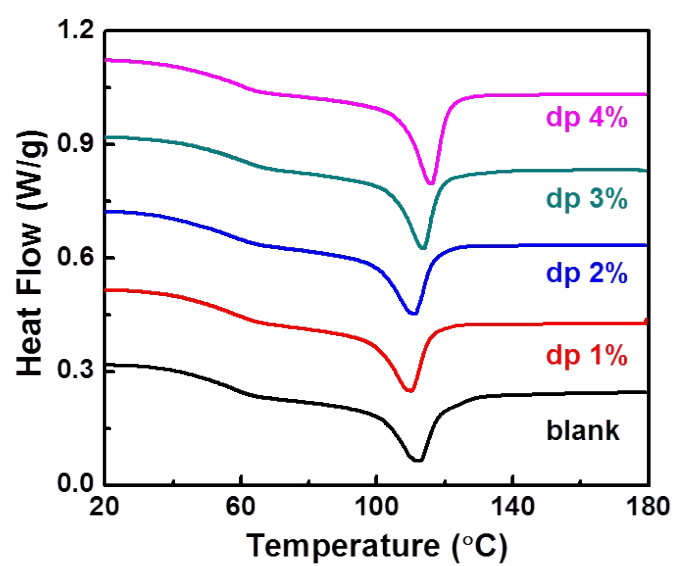

**Figure S2.** DSC thermograms of PDA-xLCE and blank samples.

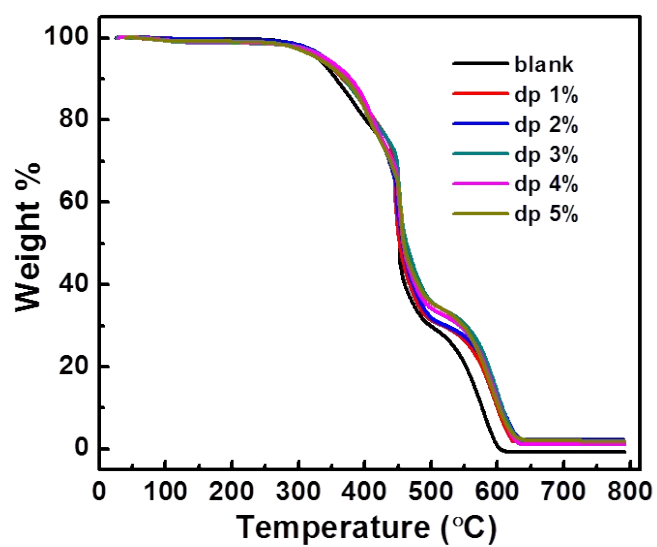

**Figure S3.** TGA curves of PDA-xLCEs and blank xLCE sample.

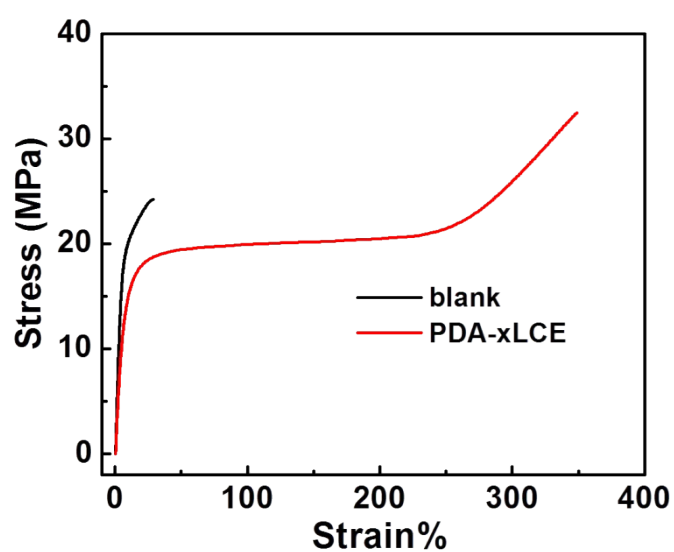

**Figure S4.** Stress-Strain curves of PDA-xLCE and blank samples at 30 °C.

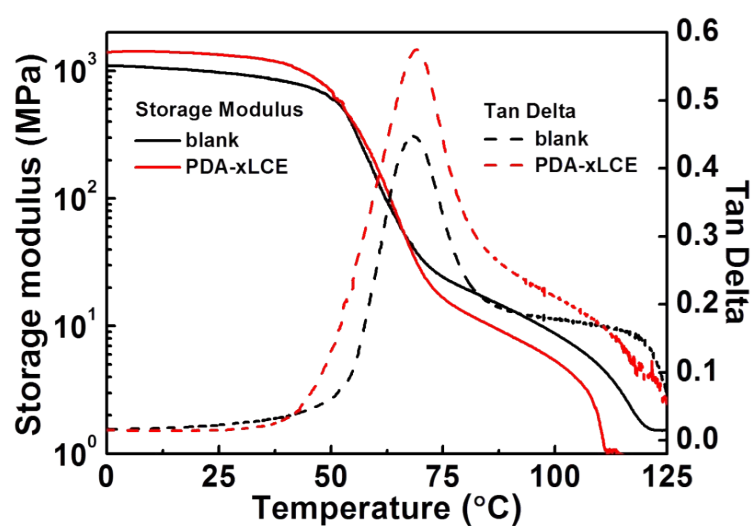

**Figure S5.** Tensile storage modulus and tan δ trace of blank and PDA-xLCE samples measured by DMA (heating rate 1°C/min).

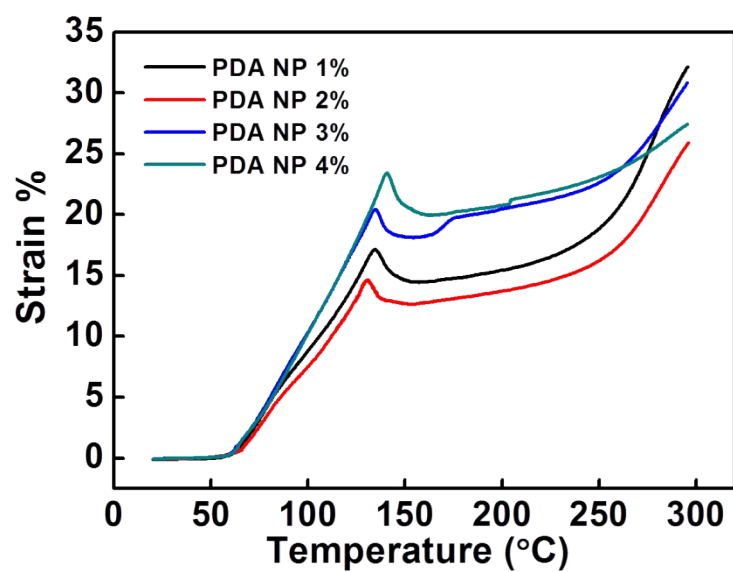

**Figure S6.** Dilatometry tests of samples with different PDA NPs contents. A trend is present that as the PDA NP content increase, the  $T_v$  increases too.

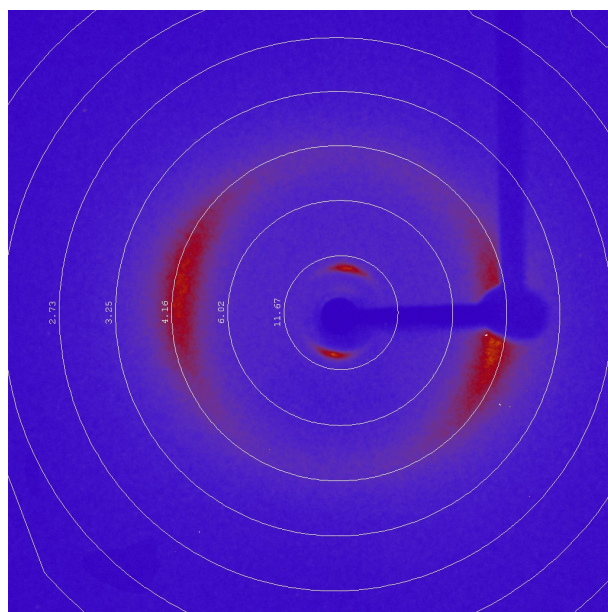

**Figure S7.** 2D XRD image of the monodomain PDA-xLCE sample.

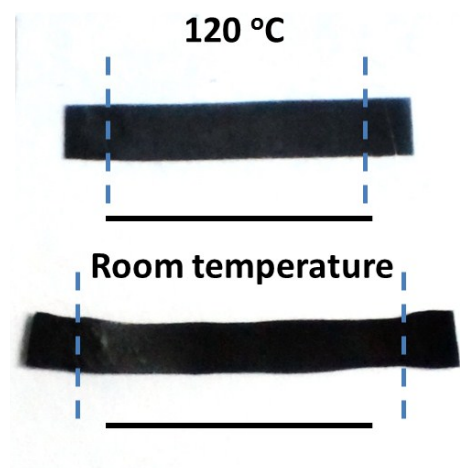

**Figure S8.** Reversible thermal actuation of a monodomain PDA-xLCE film. Scale bar: 1 cm.

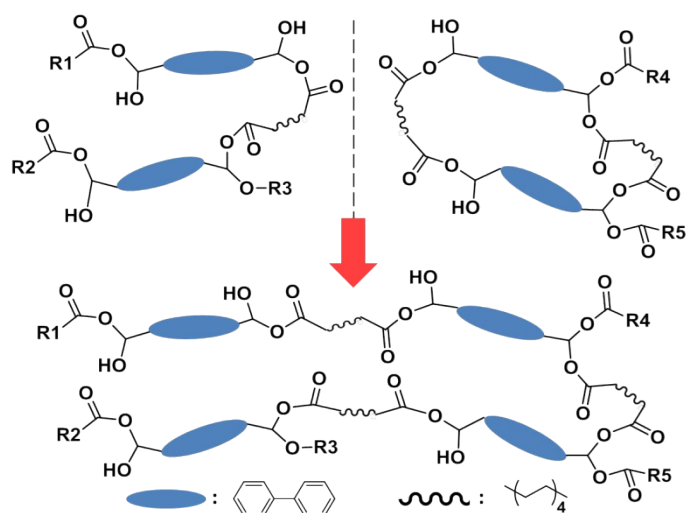

**Figure S9.** Schematic illustration for the chemical mechanism of transesterification.
